# Supplementary material
Source: ML conference proceedings conference paper supplement (https://openaccess.thecvf.com/content/CVPR2023/html/Muglikar_Event-Based_Shape_From_CVPR_2023_paper.html)
Supplement: Supplementary file 1 [file Muglikar_Event-Based_Shape_From_CVPR_2023_supplemental.zip]

Archive with 2 entries (2 files):
- esfp/CVPR23_Event_based_Shape_from_Polarization (1).pdf
- esfp/suppl_compressed.mp4
